# Supplementary material
Source: PubMed Central journal article supplement (PMC2885231)

**Table S1.** ORFs whose transcripts are repressed at least 2 fold in an *mtl1* strain compared to the wild-type. Functional annotation is based on the information provided by SGD.

| ORF     | Gene  | Ratio <i>mtl1</i> Δ/wt | Gene description; Function                                                                                           |
|---------|-------|------------------------|----------------------------------------------------------------------------------------------------------------------|
| YBL098W | BNA4  | 0.500                  | Kynurenine 3-mono oxygenase, required for biosynthesis of nicotinic acid                                             |
| YIR035C |       | 0.500                  | Unknown Function                                                                                                     |
| YKL141W | SDH3  | 0.500                  | Cytochrome b subunit of succinate dehydrogenase; respiratory chain complex II                                        |
| YLR395C | COX8  | 0.500                  | Subunit VIII of cytochrome c oxidase; mitochondrial inner membrane electron transport chain                          |
| YNL333W | SNZ3  | 0.500                  | Member of a stationary phase-induced gene family                                                                     |
| YOR065W | CYT1  | 0.500                  | Cytochrome c1, component of the mitochondrial respiratory chain; respiratory chain complex III                       |
| YAL063C | FLO9  | 0.491                  | Lectin-like protein with similarity to Flo1p, involved in flocculation                                               |
| YDR377W | ATP17 | 0.491                  | Subunit f of the F0 sector of mitochondrial F1F0 ATP synthase; proton-transporting ATP synthase complex              |
| YPL078C | ATP4  | 0.491                  | Subunit b of the stator stalk of mitochondrial F1F0 ATP synthase; proton-transporting ATP synthase complex           |
| YBR039W | ATP3  | 0.483                  | Gamma subunit of the F1 sector of mitochondrial F1F0 ATP synthase; proton-transporting ATP synthase complex          |
| YHR138C |       | 0.483                  | Unknown function; Homologous to PBI2                                                                                 |
| YJR019C | TES1  | 0.483                  | Peroxisomal acyl-CoA thioesterase; likely to be involved in fatty acid oxidation                                     |
| YJR077C | MIR1  | 0.483                  | Mitochondrial phosphate carrier, imports inorganic phosphate into mitochondria                                       |
| YDL124W |       | 0.475                  | NADPH-dependent alpha-keto amide reductase                                                                           |
| YLR231C | BNA5  | 0.475                  | Kynureninase, required for biosynthesis of nicotinic acid from tryptophan                                            |
| YOL083W |       | 0.475                  | Unknown Function                                                                                                     |
| YDL004W | ATP16 | 0.467                  | Delta subunit of the central stalk of mitochondrial F1F0 ATP synthase; proton-transporting ATP synthase              |
| YDR148C | KGD2  | 0.467                  | Dihydrolipoyl transsuccinylase, a component of the mitochondrial alpha-ketoglutarate dehydrogenase complex           |
| YDR298C | ATP5  | 0.467                  | Subunit 5 of the stator stalk of mitochondrial F1F0 ATP synthase; proton-transporting ATP synthase                   |
| YIL042C | PKP1  | 0.467                  | Mitochondrial protein kinase involved in negative regulation of pyruvate dehydrogenase complex activity              |
| YLR294C |       | 0.467                  | Unknown Function                                                                                                     |
| YML087C | AIM33 | 0.467                  | Unknown Function                                                                                                     |
| YPL271W | ATP15 | 0.467                  | Epsilon subunit of the F1 sector of mitochondrial F1F0 ATP synthase; proton-transporting ATP synthase                |
| YGL187C | COX4  | 0.459                  | Subunit IV of cytochrome c oxidase; member of the mitochondrial inner membrane electron transport chain              |
| YKL148C | SDH1  | 0.459                  | Flavoprotein subunit of succinate dehydrogenase                                                                      |
| YER158C |       | 0.451                  | Unknown function                                                                                                     |
| YGR035C |       | 0.451                  | Unknown function                                                                                                     |
| YLR295C | ATP14 | 0.451                  | Subunit h of the F0 sector of mitochondrial F1F0 ATP synthase; proton-transporting ATP synthase complex              |
| YPR191W | QCR2  | 0.451                  | Subunit 2 of the ubiquinol cytochrome-c reductase complex; mitochondrial inner membrane electron transport chain     |
| YBL045C | COR1  | 0.443                  | Core subunit of the ubiquinol-cytochrome c reductase complex ; mitochondrial inner membrane electron transport chain |
| YIL099W | SGA1  | 0.443                  | Intracellular sporulation-specific glucoamylase involved in glycogen degradation                                     |
| YCR083W | TRX3  | 0.435                  | Mitochondrial thioredoxin, required to maintain the redox homeostasis of the cell                                    |

|           |       |       |                                                                                                                 |
|-----------|-------|-------|-----------------------------------------------------------------------------------------------------------------|
| YGL104C   | VPS73 | 0.435 | Mitochondrial protein of unknown function involved in vacuolar protein sorting                                  |
| YKL150W   | MCR1  | 0.435 | Mitochondrial NADH-cytochrome b5 reductase, involved in ergosterol biosynthesis                                 |
| YHR001W-A | QCR10 | 0.428 | Subunit of the ubiquinol-cytochrome c oxidoreductase complex, involved in aerobic respiration                   |
| YLL053C   |       | 0.428 | Unknown function                                                                                                |
| YML070W   | DAK1  | 0.420 | Dihydroxyacetone kinase, required for detoxification of dihydroxyacetone (DHA); involved in stress adaptation   |
| YNL202W   | SPS19 | 0.420 | Peroxisomal 2,4-dienoyl-CoA reductase, auxiliary enzyme of fatty acid beta-oxidation                            |
| YJR079W   |       | 0.413 | Unknown function; mutation results in impaired mitochondrial respiration                                        |
| YKL016C   | ATP7  | 0.413 | Subunit d of the stator stalk of mitochondrial F1F0 ATP synthase; proton-transporting ATP synthase,             |
| YPR020W   | ATP20 | 0.413 | Subunit g of the mitochondrial F1F0 ATP synthase; proton-transporting ATP synthase complex                      |
| YDL130W-A | STF1  | 0.406 | Protein involved in regulation of the mitochondrial F1F0-ATP synthase; proton-transporting ATP synthase complex |
| YBR230C   | OM14  | 0.392 | Integral mitochondrial outer membrane protein                                                                   |
| YIR038C   | GTT1  | 0.392 | ER associated glutathione S-transferase capable of homodimerization                                             |
| YLL052C   | AQY2  | 0.386 | Water channel that mediates the transport of water across cell membranes                                        |
| YPL095C   | EEB1  | 0.386 | ethanol O-acyltransferase responsible for short-chain fatty acid ethyl ester production during fermentation     |
| YKR049C   | FMP46 | 0.372 | Mitochondrial protein of unknown function                                                                       |
| YOR107W   | RGS2  | 0.372 | Negative regulator of glucose-induced cAMP signaling                                                            |
| YDR059C   | UBC5  | 0.366 | Ubiquitin-conjugating enzyme that mediates selective degradation of abnormal proteins; stress response          |
| YHR033W   |       | 0.366 | Unknown function                                                                                                |
| YJL163C   |       | 0.366 | Unknown function                                                                                                |
| YKR076W   | ECM4  | 0.366 | Unknown function                                                                                                |
| YLL041C   | SDH2  | 0.366 | Iron-sulfur protein subunit of succinate dehydrogenase                                                          |
| YKL093W   | MBR1  | 0.347 | Protein involved in mitochondrial functions and stress response                                                 |
| YLR178C   | TFS1  | 0.342 | Carboxypeptidase Y inhibitor                                                                                    |
| YPR127W   |       | 0.342 | Unknown function                                                                                                |
| YGR052W   | FMP48 | 0.336 | Unknown function; localized in the mitochondria                                                                 |
| YJR096W   |       | 0.336 | Putative xylose and arabinose reductase                                                                         |
| YLR356W   | ATG33 | 0.330 | Mitochondrial mitophagy-specific protein                                                                        |
| YNL015W   | PBI2  | 0.330 | Cytosolic inhibitor of vacuolar proteinase B, required for efficient vacuole inheritance                        |
| YBR169C   | SSE2  | 0.324 | Member of the heat shock protein 70 (HSP70) family                                                              |
| YMR196W   |       | 0.319 | Unknown function                                                                                                |
| YJR078W   | BNA2  | 0.313 | Tryptophan 2,3-dioxygenase                                                                                      |
| YKL151C   |       | 0.313 | Unknown function                                                                                                |
| YBL043W   | ECM13 | 0.292 | Unknown function                                                                                                |
| YMR090W   |       | 0.292 | Unknown function                                                                                                |
| YOR185C   | GSP2  | 0.292 | GTP binding protein involved in the maintenance of nuclear organization, RNA processing and transport           |
| YBL015W   | ACH1  | 0.282 | Acetyl-coA hydrolase, primarily localized to mitochondria                                                       |
| YDR453C   | TSA2  | 0.277 | Stress inducible cytoplasmic thioredoxin peroxidase                                                             |

|           |        |       |                                                                                                         |
|-----------|--------|-------|---------------------------------------------------------------------------------------------------------|
| YGR248W   | SOL4   | 0.263 | 6-phosphogluconolactonase with similarity to Sol3p                                                      |
| YOR338W   |        | 0.263 | Unknown function                                                                                        |
| YGL156W   | AMS1   | 0.254 | Vacuolar alpha mannosidase, involved in free oligosaccharide (fOS) degradation                          |
| YBR054W   | YRO2   | 0.250 | Putative plasma membrane protein of unknown function                                                    |
| YER103W   | SSA4   | 0.237 | Heat shock protein that is highly induced upon stress                                                   |
| YDL085W   | NDE2   | 0.233 | Mitochondrial external NADH dehydrogenase, catalyzes the oxidation of cytosolic NADH                    |
| YMR250W   | GAD1   | 0.225 | Glutamate decarboxylase; involved in response to oxidative stress                                       |
| YOL155C   | HPF1   | 0.221 | Haze-protective mannoprotein                                                                            |
| YML123C   | PHO84  | 0.218 | High-affinity inorganic phosphate (Pi) transporter and low-affinity manganese transporter               |
| YDL222C   | FMP45  | 0.203 | Unknown function                                                                                        |
| YDR034W-B |        | 0.186 | Unknown function                                                                                        |
| YGR088W   | CTT1   | 0.183 | Cytosolic catalase T, has a role in protection from oxidative damage by hydrogen peroxide               |
| YKL163W   | PIR3   | 0.183 | O-glycosylated covalently-bound cell wall protein required for cell wall stability                      |
| YOL084W   | PHM7   | 0.183 | Unknown function                                                                                        |
| YDL181W   | INH1   | 0.180 | Protein that inhibits ATP hydrolysis by the F1F0-ATP synthase; proton-transporting ATP synthase complex |
| YML128C   | MSC1   | 0.174 | Unknown function                                                                                        |
| YDL204W   | RTN2   | 0.151 | Unknown function                                                                                        |
| YFL014W   | HSP12  | 0.151 | Plasma membrane localized protein that protects membranes from desiccation                              |
| YOL053C-A | DDR2   | 0.151 | Multistress response protein                                                                            |
| YFL030W   | AGX1   | 0.144 | Glyoxylate aminotransferase, catalyzes the synthesis of glycine from glyoxylate                         |
| YIL160C   | POT1   | 0.134 | 3-ketoacyl-CoA thiolase; beta-oxidation of fatty acids                                                  |
| YGR043C   | NQM1   | 0.125 | Transaldolase of unknown function                                                                       |
| YMR107W   | SPG4   | 0.119 | Unknown function                                                                                        |
| YBR072W   | HSP26  | 0.102 | Small heat shock protein with chaperone activity                                                        |
| YMR169C   | ALD3   | 0.098 | Cytoplasmic aldehyde dehydrogenase, involved in beta-alanine synthesis                                  |
| YHR139C   | SPS100 | 0.093 | Protein required for spore wall maturation                                                              |
| YGR256W   | GND2   | 0.090 | 6-phosphogluconate dehydrogenase                                                                        |
| YBR116C   |        | 0.084 | Unknown function                                                                                        |
| YDL223C   | HBT1   | 0.084 | Substrate of the Hub1p ubiquitin-like protein that localizes to the shmoo tip                           |
| YDR070C   | FMP16  | 0.076 | Unknown function; mitochondrion                                                                         |
| YPL223C   | GRE1   | 0.061 | Hydrophilin of unknown function; stress induced                                                         |
| YMR175W   | SIP18  | 0.041 | Protein of unknown function whose expression is induced by osmotic stress                               |
| YBR117C   | TKL2   | 0.016 | Transketolase, similar to Tk1p; required for synthesis of aromatic amino acids                          |

**Table S2.** ORFs whose transcripts are induced at least 2 fold in an *mtl1* strain compared to the wild-type. Functional annotation is based on the information provided by SGD.

| ORF     | Gene | Ratio <i>mtl1</i> Δ/wt | Gene description; Function                                             |
|---------|------|------------------------|------------------------------------------------------------------------|
| YMR095C | SNO1 | 3.249                  | Protein involved in pyridoxine metabolism                              |
| YNR060W | FRE4 | 3.249                  | Ferric reductase;iron-siderophore transport                            |
| YPL250C | ICY2 | 3.138                  | Protein involved in chromatin organization and nuclear transport,      |
| YMR011W | HXT2 | 2.878                  | High-affinity glucose transporter of the major facilitator superfamily |
| YIL121W | QDR2 | 2.828                  | Multidrug transporter                                                  |
| YBR145W | ADH5 | 2.685                  | Alcohol dehydrogenase isoenzyme V                                      |
| YGL117W |      | 2.685                  | Unknown Function                                                       |
| YBR244W | GPX2 | 2.594                  | Phospholipid hydroperoxide glutathione peroxidase; oxidative stress    |
| YER081W | SER3 | 2.219                  | 3-phosphoglycerate dehydrogenase                                       |
| YBR115C | LYS2 | 2.107                  | Alpha amino adipate reductase; biosynthesis of lysine                  |
| YPL111W | CAR1 | 2.107                  | Arginase, responsible for arginine degradation                         |
| YMR096W | SNZ1 | 2.000                  | Protein involved in vitamin B6 biosynthesis                            |
| YOL158C | ENB1 | 2.000                  | Endosomal ferric enterobactin transporter                              |

**Table S3. Classification of the collection of genes whose expression was lower in *mtl1* than in wild type cells. We present two different classifications. The first according to GO Biological Process and the second according to MIPS functional classification.**

GO Biological Process

| Category                                         | p-value    | In Category from Cluster                                                                                                                                | k  |
|--------------------------------------------------|------------|---------------------------------------------------------------------------------------------------------------------------------------------------------|----|
| oxidation reduction                              | 5,78E-13   | BNA4 LYS2 ADH5 GPX2 NDE2 YDL124W TSA2 SER3 COX4 CTT1 GND2<br>YIR035C MIR1 BNA2 YJR096W SDH1 MCR1 FMP46 SDH2 COX8 AIM33 ALD3<br>SPS19 FRE4 ATP20 YPR127W | 26 |
| metabolic process                                | 3,96E-05   | BNA4 LYS2 TKL2 ADH5 INH1 KGD2 SER3 AGX1 AMS1 NQM1 GND2 SGA1<br>POT1 YIR035C YMR090W SNZ1 ALD3 SPS19 SNZ2                                                | 19 |
| response to oxidative stress; response to stress |            | GPX2 TRX3 YDL124W TSA2 HSP12 CTT1 YJR096W MCR1 GAD1; HSP26 SSE2<br>UBC5 SSA4 DAK1 ALD3 DDR2 YOR338W GRE1                                                | 18 |
| ATP synthesis coupled proton transport           | 4,81E-07   | ATP3 ATP16 ATP5 ATP17 ATP7 ATP14 ATP4 ATP15 ATP20                                                                                                       | 9  |
| mitochondrial electron transport                 |            | SDH3 SDH1 SDH2; QCR10 CYT1 QCR2                                                                                                                         | 6  |
| aromatic compound metabolic process              | 0,00298911 | ADH5 YDL124W SER3 SNO1 ENB1                                                                                                                             | 5  |
| ascospore formation                              | 0,00962488 | FMP45 UBC5 SGA1 SPS19 YOR338W                                                                                                                           | 5  |
| pentose-phosphate shunt                          | 0,00041566 | TKL2 NQM1 SOL4 GND2                                                                                                                                     | 4  |
| de novo NAD biosynthetic process from tryptophan | 5,02E-05   | BNA4 BNA2 BNA5                                                                                                                                          | 3  |
| pyridoxine biosynthetic process                  | 0,00076692 | SNO1 SNZ1 SNZ2                                                                                                                                          | 3  |
| cell death                                       | 0,00895324 | COX4 CYT1 QCR2                                                                                                                                          | 3  |

|                                                                     |            |                                                   |   |
|---------------------------------------------------------------------|------------|---------------------------------------------------|---|
| proton transport [GO:0015992]                                       | 2,51E-07   | ATP3 ATP16 ATP5 ATP17 ATP7 ATP14 ATP4 ATP15 ATP20 | 9 |
| negative regulation of nucleotide metabolic process<br>[GO:0045980] | 0,00030074 | STF1 INH1                                         | 2 |
| ATP biosynthetic process [GO:0006754]                               | 7,01E-10   | ATP3 ATP16 ATP5 ATP17 ATP7 ATP14 ATP15 ATP20      | 8 |

pyridoxine metabolic process [GO:0008614]  
ion transport [GO:0006811]  
amino acid and derivative metabolic process [GO:0006519]

0,00544529 SNO1 SNZ1 SNZ2  
7,21E-07 ATP3 YRO2 ATP16 ATP5 ATP17 ATP7 ATP14 FRE4 ENB1 ATP4 ATP15 ATP20  
0,00596414 BNA4 SER3

3  
12  
2

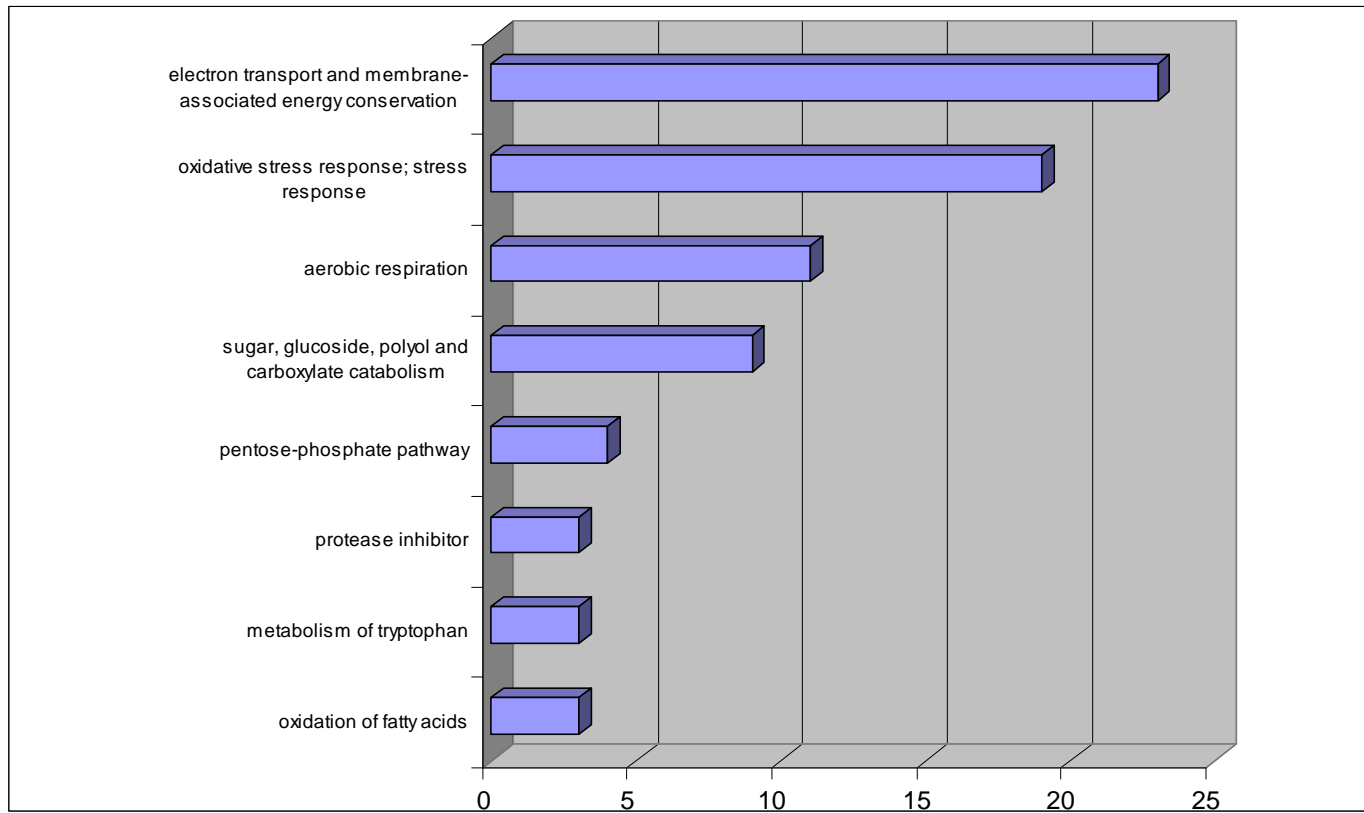

| MIPS Functional Classification                                 |          |                                                                                                                           |
|----------------------------------------------------------------|----------|---------------------------------------------------------------------------------------------------------------------------|
| Category                                                       | p-value  | In Category from Cluster                                                                                                  |
| electron transport and membrane-associated energy conservation |          | COR1 ATP3 ATP16 NDE2 STF1 INH1 ATP5 ATP17 COX4 QCR10 ATP7 SDH3 SDH1 M<br>SDH2 ATP14 COX8 ATP4 ATP15 ATP20 QCR2; TRX3 CYT1 |
| oxidative stress response; stress response                     |          | GPX2 TRX3 TSA2 HSP12 CTT1 GTT1 MCR1 FMP46 GAD1 GRE1; YRO2 SSE2 PIR3 DA<br>SNO1 SNZ1 ALD3 SNZ2 DDR2                        |
| aerobic respiration                                            | 7,03E-08 | COR1 NDE2 COX4 QCR10 MBR1 SDH3 SDH1 SDH2 COX8 CYT1 QCR2                                                                   |
| sugar, glucoside, polyol and carboxylate catabolism            | 9,83E-06 | TKL2 KGD2 AMS1 NQM1 YJR096W SDH3 SDH1 SDH2 HPF1                                                                           |
| pentose-phosphate pathway                                      | 0,000833 | TKL2 NQM1 SOL4 GND2                                                                                                       |
| protease inhibitor                                             | 5,02E-05 | YHR138C TFS1 PBI2                                                                                                         |
| metabolism of tryptophan                                       | 0,00027  | BNA4 BNA2 BNA5                                                                                                            |
| oxidation of fatty acids                                       | 0,000401 | POT1 TES1 SPS19                                                                                                           |

Fe/S binding [16.21.08]

homeostasis of phosphate [34.01.03.03]

tricarboxylic-acid pathway (citrate cycle, Krebs cycle, TCA cycle)  
[02.10]

cation transport (H<sup>+</sup>, Na<sup>+</sup>, K<sup>+</sup>, Ca<sup>2+</sup>, NH<sub>4</sub><sup>+</sup>, etc.) [20.01.01.01]

homeostasis of protons [34.01.01.03]

5,02E-05 SDH3 SDH1 SDH2

0,009994 MIR1 PHO84

0,001911 KGD2 SDH3 SDH1 SDH2

2,05E-05 ATP3 ATP16 ATP5 ATP17 ATP7 ATP14 ATP4 ATP15

1,18E-06 ATP3 ATP16 ATP5 ATP7 ATP14 PHO84 ATP4 ATP15

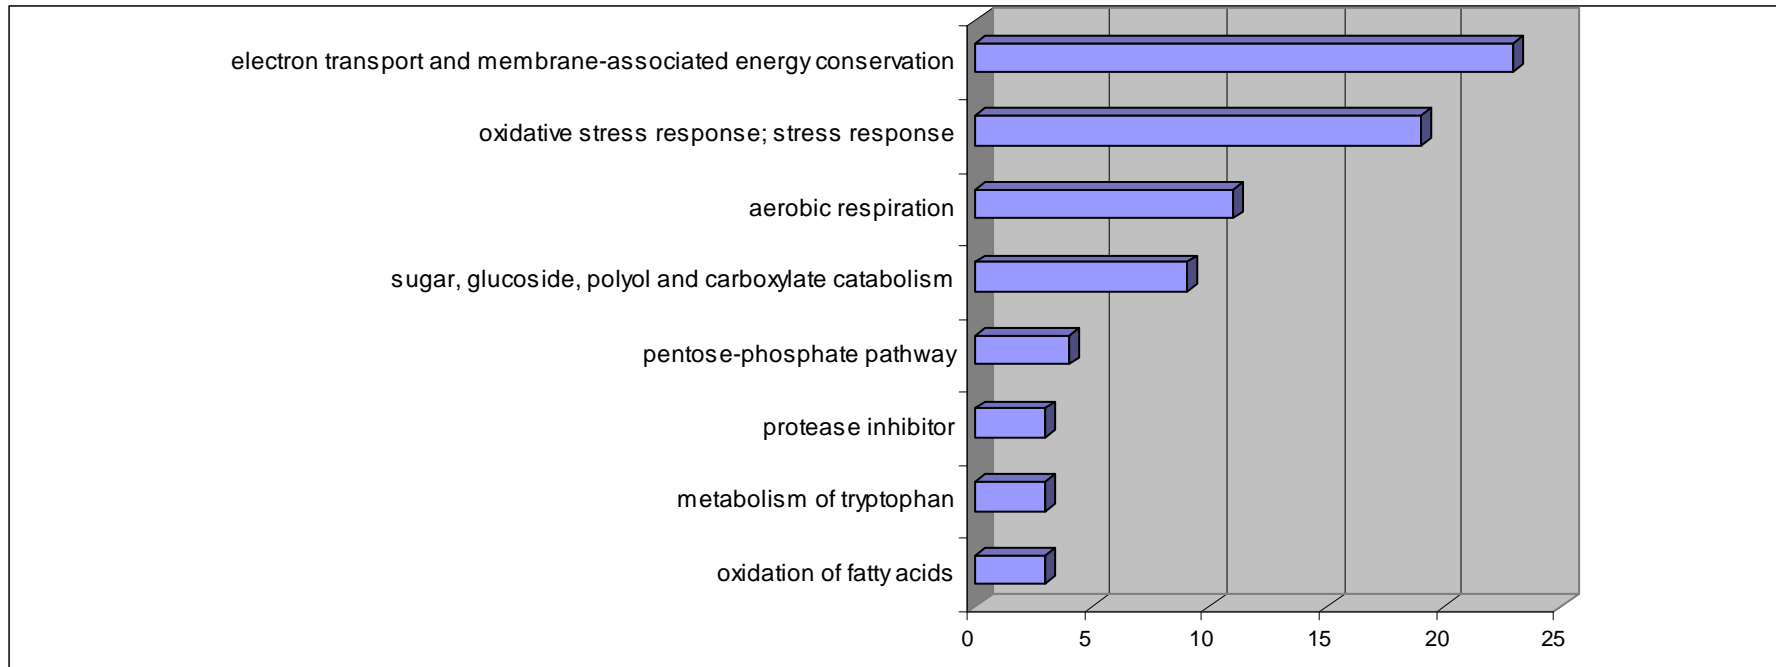

Supplement: supp_M109.085282_jbc.M109.085282-1.pdf [file supp_M109.085282_jbc.M109.085282-1.pdf]
